# Supplementary material
Source: PubMed Central journal article supplement (PMC1129136)

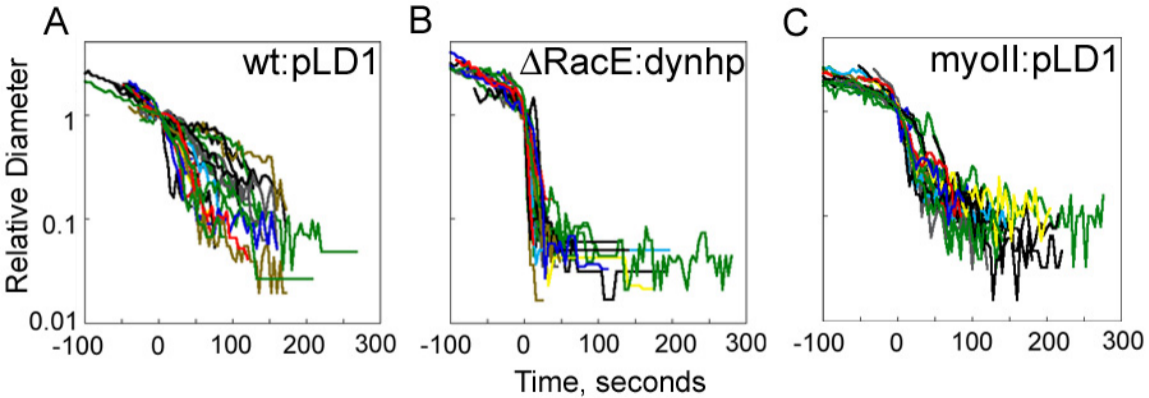

Supplement: pnas_0502545102_1.pdf [file pnas_0502545102_1.pdf]

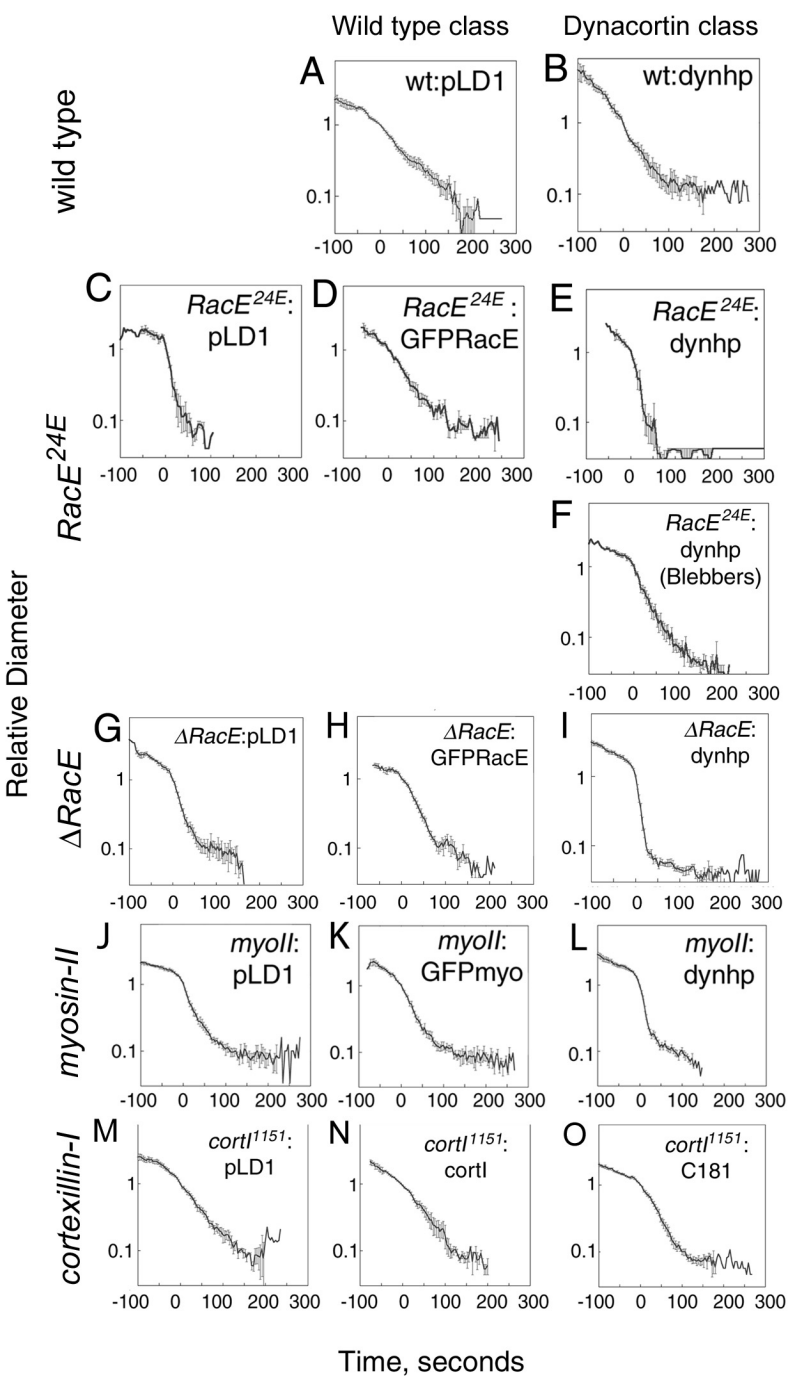

Supplement: pnas_0502545102_2.pdf [file pnas_0502545102_2.pdf]

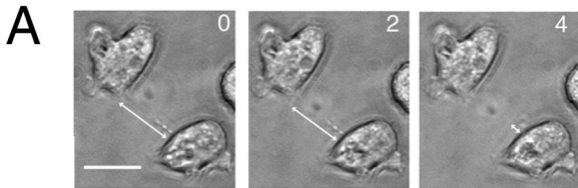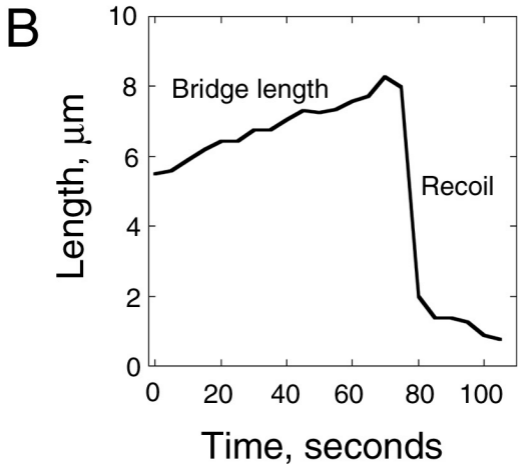

Supplement: pnas_0502545102_4.pdf [file pnas_0502545102_4.pdf]

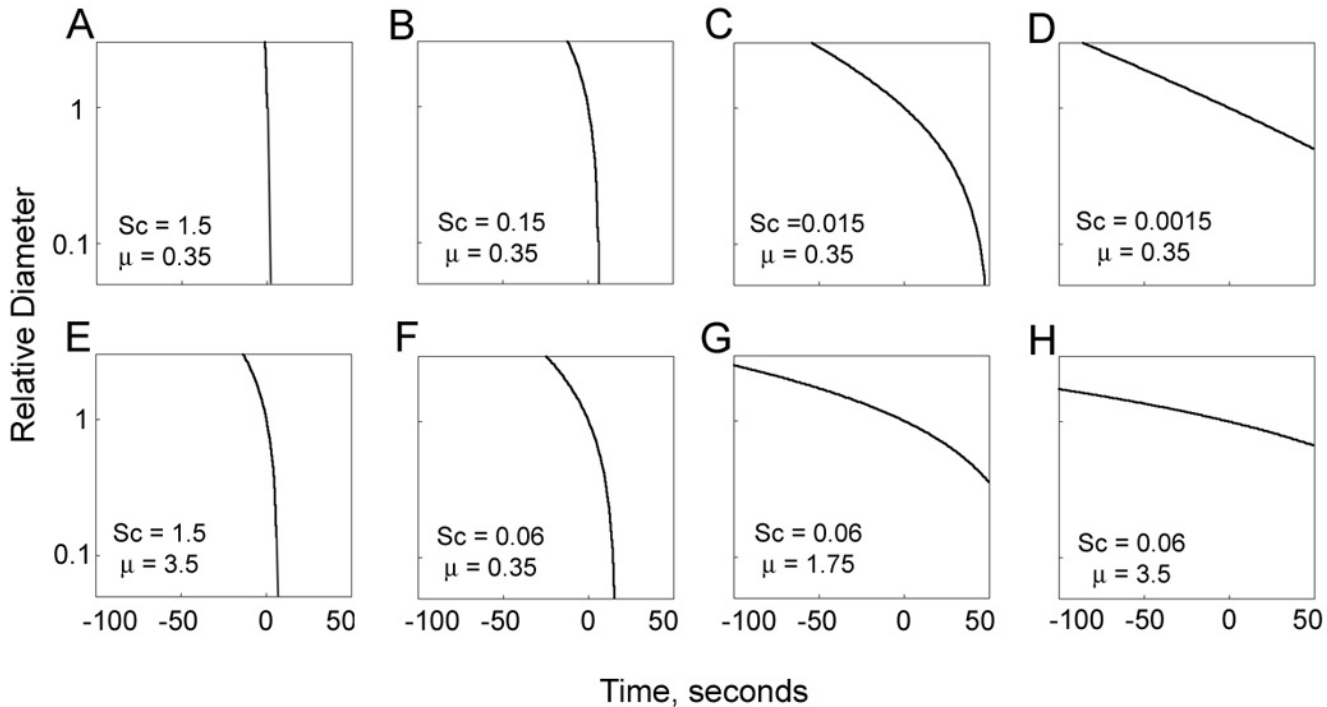

Supplement: pnas_0502545102_5.pdf [file pnas_0502545102_5.pdf]
